# Supplementary material for: The patient and clinician experience of informed consent for surgery: a systematic review of the qualitative evidence
Source: PubMed Central journal article supplement (PMC7353438; doi:10.1186/s12910-020-00501-6), 2020-07-11
Supplement: 12910_2020_501_MOESM7_ESM.pdf [file 12910_2020_501_MOESM7_ESM.pdf]

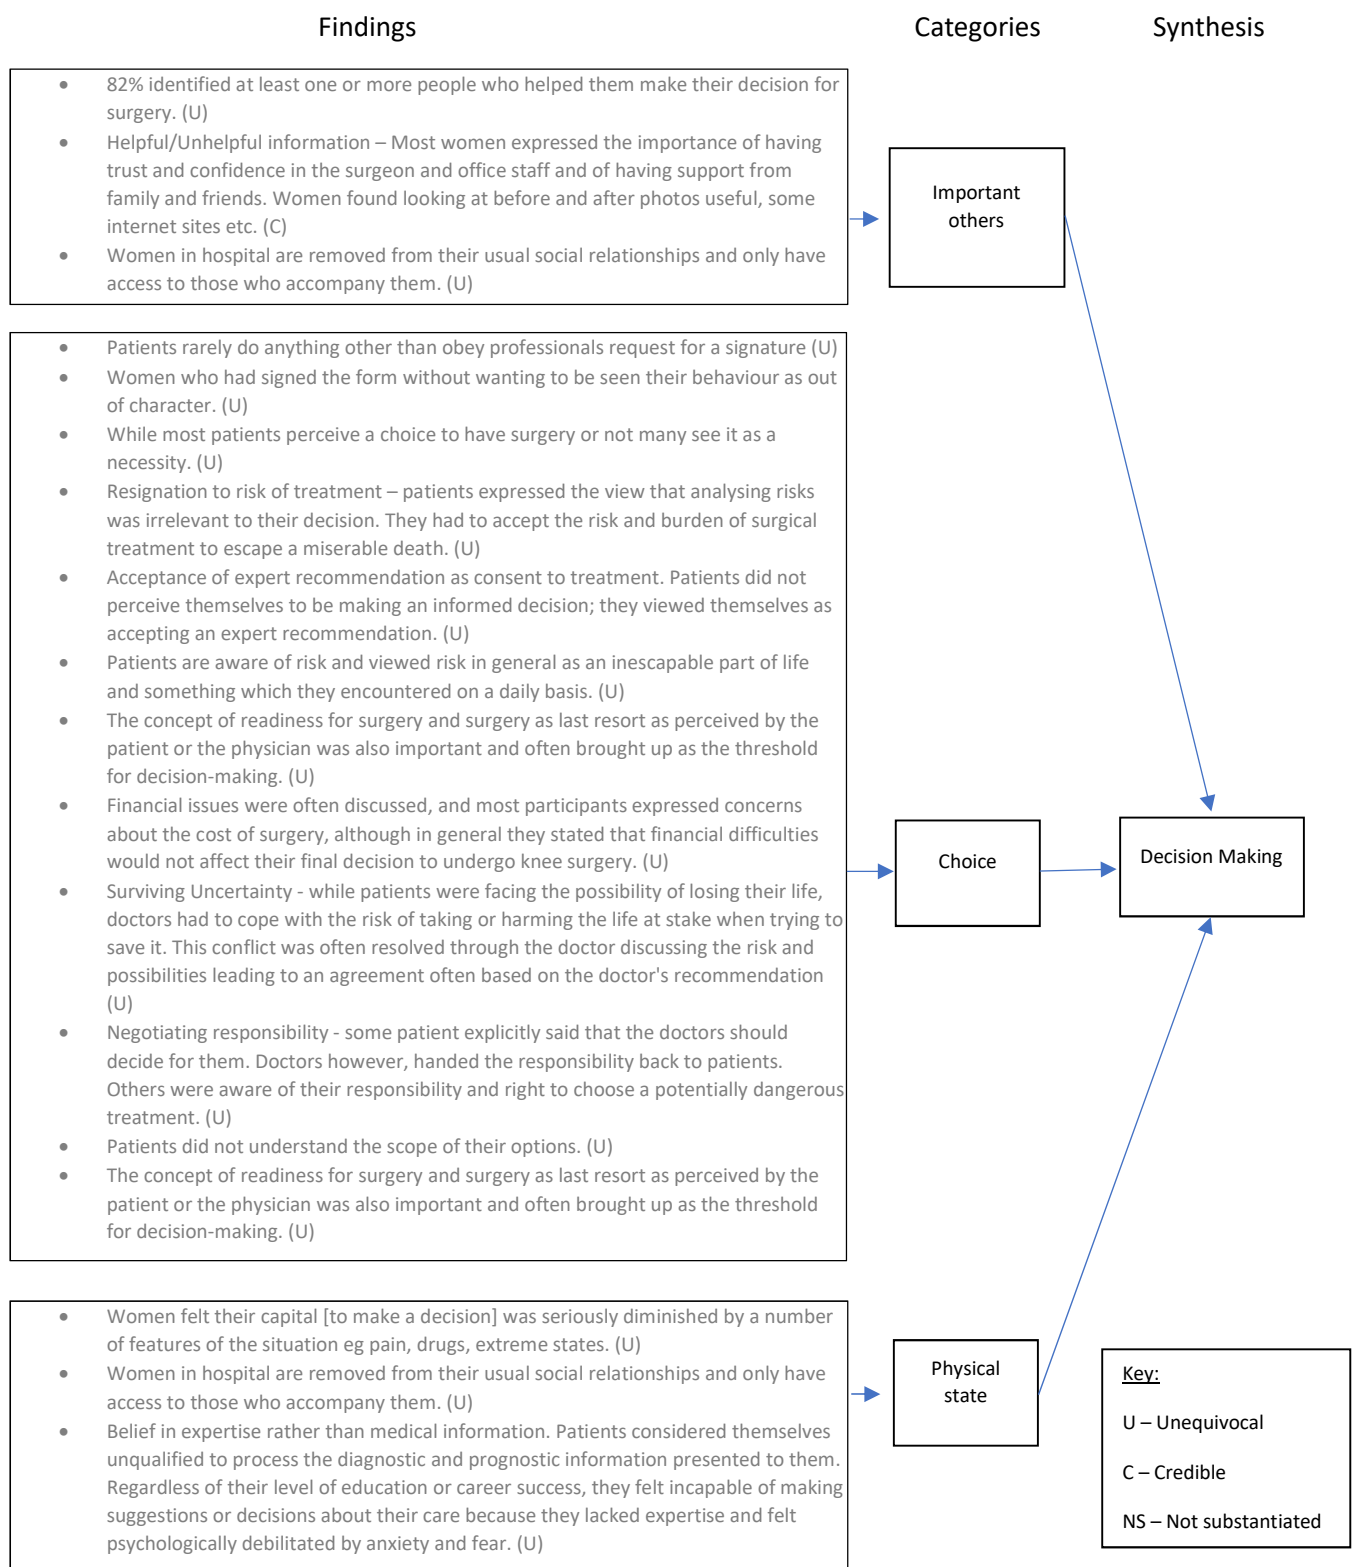

Figure 7: Decision making synthesised finding.
